# Supplementary material for: Synthesis and characterisation of anionic and neutral gallium(i) N-heterocyclic carbene analogues
Source: Royal Society of Chemistry journal article supplement (doi:10.1039/c2dt30299c), 2012-01-01
Supplement: c2dt30299c.pdf [file c2dt30299c.pdf]

S1

**Synthesis and Characterisation of Anionic and Neutral Gallium(I) N-Heterocyclic Carbene  
Analogues**

**Deepak Dange, Sam L. Choong, Christian Schenk, Andreas Stasch, and Cameron Jones\***

School of Chemistry, PO Box 23, Monash University, VIC, 3800, Australia.

**SUPPLEMENTARY INFORMATION**

**Table S1.** Summary of crystallographic data for **6a-d**, **7**, **8**, **10**, **11**, DAB\* **1S**, Ar\*NH<sub>2</sub> **2S**, a cyclic isomer of DAB\*H<sub>2</sub> **3S** and [NaI(18-crown-6)] **4S**

|                                        | <b>6a</b> ·(toluene)                                | <b>6b</b> ·(benzene) <sub>3</sub> <sup>a</sup>      | <b>6c</b> ·(THF) <sub>2</sub>                                      | <b>6d</b> ·(OEt <sub>2</sub> ) <sup>a</sup>                       | <b>7</b> ·(benzene) <sub>2</sub>                      | <b>8</b> ·(toluene) <sub>2</sub>                   | <b>10</b>                                        |
|----------------------------------------|-----------------------------------------------------|-----------------------------------------------------|--------------------------------------------------------------------|-------------------------------------------------------------------|-------------------------------------------------------|----------------------------------------------------|--------------------------------------------------|
| empirical formula                      | C <sub>88</sub> H <sub>88</sub> GaN <sub>4</sub> Na | C <sub>92</sub> H <sub>90</sub> GaN <sub>4</sub> Na | C <sub>92</sub> H <sub>104</sub> GaN <sub>2</sub> NaO <sub>6</sub> | C <sub>82</sub> H <sub>92</sub> GaN <sub>4</sub> NaO <sub>6</sub> | C <sub>86</sub> H <sub>83</sub> BrGaN <sub>4</sub> Zn | C <sub>86</sub> H <sub>87</sub> CdGaN <sub>4</sub> | C <sub>29</sub> H <sub>41</sub> GaN <sub>2</sub> |
| formula weight                         | 1294.33                                             | 1344.39                                             | 1426.48                                                            | 1258.31                                                           | 1387.56                                               | 1509.64                                            | 487.36                                           |
| crystal system                         | triclinic                                           | orthorhombic                                        | monoclinic                                                         | monoclinic                                                        | monoclinic                                            | monoclinic                                         | triclinic                                        |
| space group                            | <i>P</i> -1                                         | <i>Pna</i> 2 <sub>1</sub>                           | <i>C</i> 2/ <i>c</i>                                               | <i>P</i> 2 <sub>1</sub>                                           | <i>P</i> 2 <sub>1</sub> / <i>n</i>                    | <i>P</i> 2 <sub>1</sub> / <i>n</i>                 | <i>P</i> -1                                      |
| <i>T</i> (K)                           | 173(2)                                              | 173(2)                                              | 173(2)                                                             | 173(2)                                                            | 123(2)                                                | 123(2)                                             | 173(2)                                           |
| <i>a</i> (Å)                           | 12.329(3)                                           | 22.532(5)                                           | 36.638(7)                                                          | 12.676(3)                                                         | 13.5440(5)                                            | 13.573(3)                                          | 8.0968(7)                                        |
| <i>b</i> (Å)                           | 12.390(3)                                           | 14.975(3)                                           | 11.566(2)                                                          | 20.958(4)                                                         | 23.6390(11)                                           | 23.932(3)                                          | 13.8541(14)                                      |
| <i>c</i> (Å)                           | 24.625(5)                                           | 22.623(5)                                           | 25.970(5)                                                          | 14.496(3)                                                         | 22.6239(10)                                           | 23.130(16)                                         | 14.1577(16)                                      |
| <i>α</i> (deg.)                        | 88.71(3)                                            | 90                                                  | 90                                                                 | 90                                                                | 90                                                    | 90                                                 | 62.271(11)                                       |
| <i>β</i> (deg)                         | 83.10(3)                                            | 90                                                  | 134.67(3)                                                          | 111.37(3)                                                         | 101.617(4)                                            | 101.35(5)                                          | 74.193(9)                                        |
| <i>γ</i> (deg.)                        | 74.15(3)                                            | 90                                                  | 90                                                                 | 90                                                                | 90                                                    | 90                                                 | 89.796(7)                                        |
| vol (Å <sup>3</sup> )                  | 3592.1(13)                                          | 7633(3)                                             | 7827(3)                                                            | 3586.4(12)                                                        | 7095.0(5)                                             | 7366(6)                                            | 1338.4(2)                                        |
| <i>Z</i>                               | 2                                                   | 4                                                   | 4                                                                  | 2                                                                 | 4                                                     | 4                                                  | 2                                                |
| <i>ρ</i> (calcd) (g.cm <sup>-3</sup> ) | 1.197                                               | 1.170                                               | 1.211                                                              | 1.165                                                             | 1.299                                                 | 1.361                                              | 1.209                                            |
| <i>μ</i> (mm <sup>-1</sup> )           | 0.438                                               | 0.414                                               | 0.413                                                              | 0.438                                                             | 1.329                                                 | 1.122                                              | 1.046                                            |
| <i>F</i> (000)                         | 1372                                                | 2848                                                | 3040                                                               | 1340                                                              | 2892                                                  | 3100                                               | 520                                              |
| reflections collected                  | 22354                                               | 23253                                               | 14618                                                              | 12281                                                             | 25577                                                 | 29475                                              | 14255                                            |

|                                               |             |                             |             |             |             |                            |             |
|-----------------------------------------------|-------------|-----------------------------|-------------|-------------|-------------|----------------------------|-------------|
| unique reflections                            | 13209       | 13301                       | 7663        | 12281       | 12675       | 12935                      | 7651        |
| $R_{\text{int}}$                              | 0.0288      | 0.0421                      | 0.0333      | 0.0000      | 0.0675      | 0.0440                     | 0.1012      |
| R1 indices [ $I > 2\sigma(I)$ ]               | 0.0500      | 0.0862                      | 0.0506      | 0.0529      | 0.0630      | 0.0624                     | 0.0517      |
| wR2 indices (all data)                        | 0.1324      | 0.2483                      | 0.1470      | 0.0908      | 0.1617      | 0.1516                     | 0.1218      |
| Largest peak and hole<br>(e.Å <sup>-3</sup> ) | 0.83, -0.40 | 1.74 (near<br>Ga(1)), -0.76 | 0.79, -0.44 | 0.40, -0.22 | 1.21, -0.84 | 2.02 (near I(1)),<br>-1.25 | 1.04, -0.77 |
| CCDC No.                                      | 866218      | 866219                      | 866220      | 866221      | 866222      | 866223                     | 866224      |

<sup>a</sup> the absolute structure parameters for the racemically twinned crystal structures of **6b** and **6d** were 0.488(18) and 0.438(8) respectively.

|                   | <b>11</b> ·(hexane)                                                            | <b>1S</b>                                      | <b>2S</b>                          | <b>3S</b> ·(OEt <sub>2</sub> )                   | <b>4S</b>                                         |
|-------------------|--------------------------------------------------------------------------------|------------------------------------------------|------------------------------------|--------------------------------------------------|---------------------------------------------------|
| empirical formula | C <sub>93</sub> H <sub>137</sub> Ga <sub>5</sub> I <sub>4</sub> N <sub>6</sub> | C <sub>68</sub> H <sub>56</sub> N <sub>2</sub> | C <sub>33</sub> H <sub>29</sub> N  | C <sub>72</sub> H <sub>68</sub> N <sub>2</sub> O | C <sub>12</sub> H <sub>24</sub> INaO <sub>6</sub> |
| formula weight    | 2195.29                                                                        | 901.15                                         | 439.57                             | 977.28                                           | 414.20                                            |
| crystal system    | triclinic                                                                      | triclinic                                      | monoclinic                         | triclinic                                        | monoclinic                                        |
| space group       | <i>P</i> -1                                                                    | <i>P</i> -1                                    | <i>P</i> 2 <sub>1</sub> / <i>n</i> | <i>P</i> -1                                      | <i>P</i> 2 <sub>1</sub> / <i>n</i>                |
| <i>T</i> (K)      | 123(2)                                                                         | 173(2)                                         | 123(2)                             | 173(2)                                           | 173(2)                                            |
| <i>a</i> (Å)      | 14.8206(4)                                                                     | 9.1640(18)                                     | 9.5232(15)                         | 13.639(3)                                        | 13.5047(3)                                        |
| <i>b</i> (Å)      | 17.7618(5)                                                                     | 10.472(2)                                      | 11.2997(15)                        | 14.388(3)                                        | 8.5025(2)                                         |
| <i>c</i> (Å)      | 18.7240(6)                                                                     | 13.747(3)                                      | 22.111(3)                          | 14.442(3)                                        | 15.2667(5)                                        |
| $\alpha$ (deg.)   | 84.734(3)                                                                      | 99.63(3)                                       | 90                                 | 101.09(3)                                        | 90                                                |
| $\beta$ (deg.)    | 89.572(2)                                                                      | 103.84(3)                                      | 93.139(6)                          | 92.85(3)                                         | 106.372(3)                                        |
| $\gamma$ (deg.)   | 85.108(2)                                                                      | 99.14(3)                                       | 90                                 | 96.22(3)                                         | 90                                                |

S4

|                                                              |                            |             |             |             |                            |
|--------------------------------------------------------------|----------------------------|-------------|-------------|-------------|----------------------------|
| vol (Å <sup>3</sup> )                                        | 4890.2(2)                  | 1235.3(4)   | 2375.8(6)   | 2757.7(10)  | 1681.79(8)                 |
| <i>Z</i>                                                     | 2                          | 1           | 4           | 2           | 4                          |
| $\rho$ (calcd) (g.cm <sup>-3</sup> )                         | 1.491                      | 1.211       | 1.229       | 1.177       | 1.636                      |
| $\mu$ (mm <sup>-1</sup> )                                    | 2.666                      | 0.069       | 0.070       | 0.068       | 1.949                      |
| <i>F</i> (000)                                               | 2208                       | 478         | 936         | 1044        | 832                        |
| reflections collected                                        | 30630                      | 8046        | 16304       | 20230       | 6907                       |
| unique reflections                                           | 17610                      | 4316        | 4181        | 10803       | 2946                       |
| <i>R</i> <sub>int</sub>                                      | 0.0466                     | 0.0768      | 0.1468      | 0.0336      | 0.0209                     |
| R1 indices [ <i>I</i> >2 $\sigma$ ( <i>I</i> )] <sup>a</sup> | 0.0553                     | 0.0597      | 0.0657      | 0.0505      | 0.0343                     |
| wR2 indices (all data) <sup>b</sup>                          | 0.1476                     | 0.1550      | 0.1529      | 0.1423      | 0.0917                     |
| Largest peak and hole<br>(e.Å <sup>-3</sup> )                | 2.00 (near<br>I(2)), -1.22 | 0.18, -0.16 | 0.28, -0.31 | 0.32, -0.26 | 1.97 (near I(1)),<br>-1.32 |
| CCDC No.                                                     | 866225                     | 866214      | 866215      | 866216      | 866217                     |

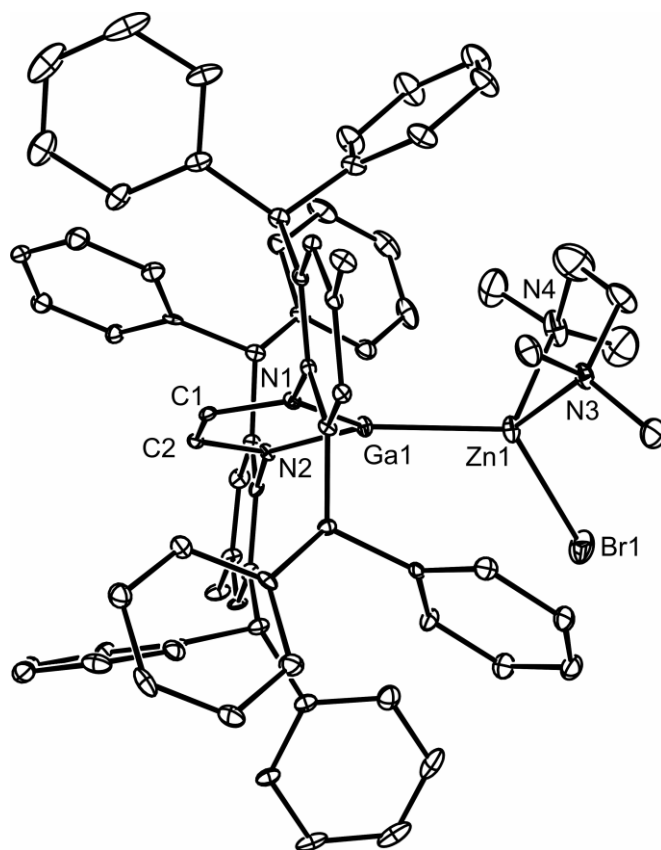

**Figure S1.** Molecular structure of **7** (25% displacement ellipsoids are shown; hydrogens omitted).

See main text for geometrical parameters.

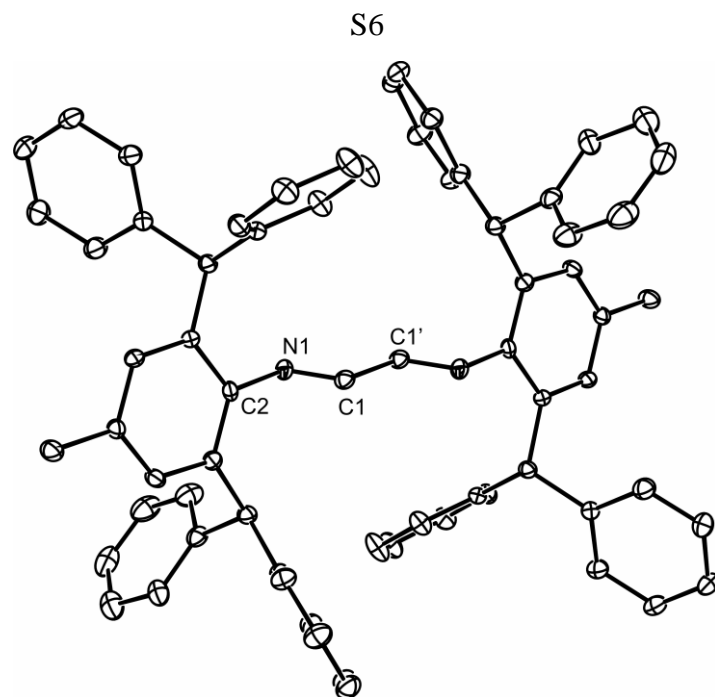

**Figure S2.** Molecular structure of **1S** (25% displacement ellipsoids are shown; hydrogens omitted). Selected bond lengths (Å) and angles (°): N(1)-C(1) 1.258(3), N(1)-C(2) 1.432(3), C(1)-C(1') 1.464(5), C(1)-N(1)-C(2) 119.1(2), N(1)-C(1)-C(1') 121.3(3). Symmetry operation: '-x, -y+1, -z'.

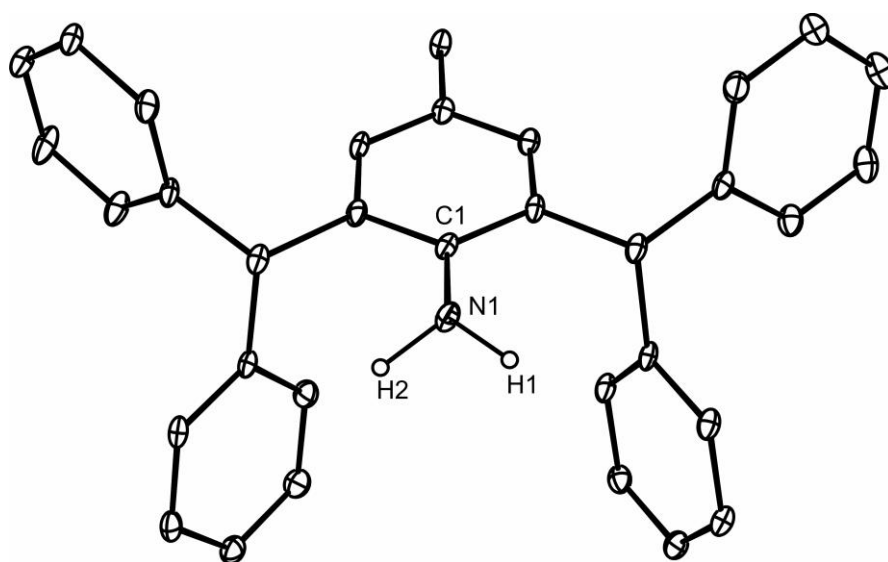

**Figure S3.** Molecular structure of **2S** (25% displacement ellipsoids are shown; non-amino hydrogens omitted).

S7

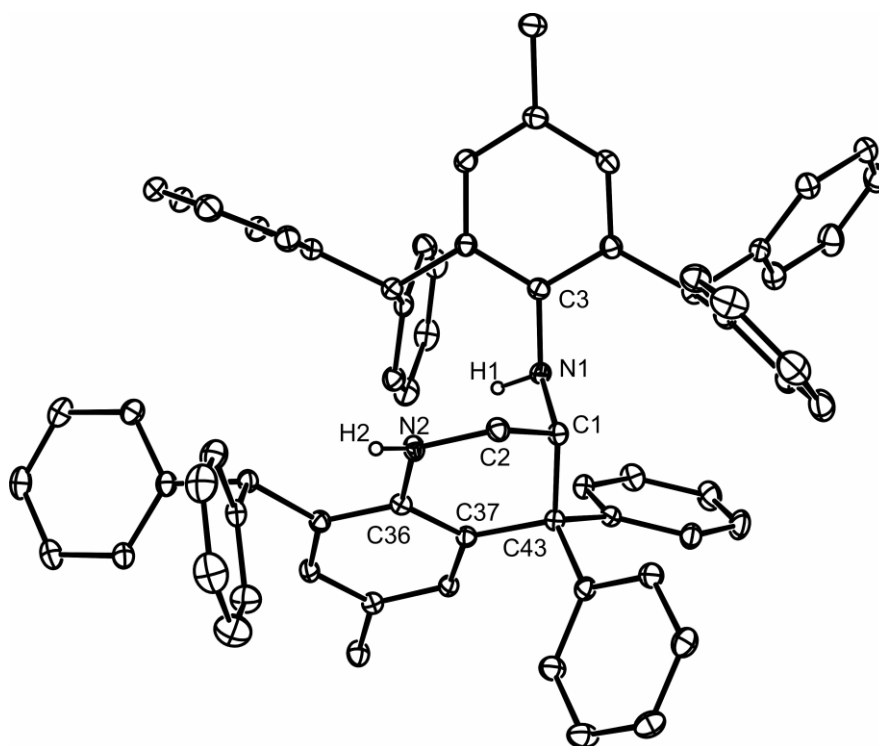

**Figure S4.** Molecular structure of **3S** (25% displacement ellipsoids are shown; non-amino hydrogens omitted). Selected bond lengths (Å) and angles (°): N(1)-C(1) 1.468(2), C(1)-C(2) 1.526(2), C(1)-C(43) 1.558(2), N(2)-C(36) 1.395(2), N(2)-C(2) 1.448(2), C(36)-C(37) 1.408(2), C(37)-C(43) 1.536(2), N(1)-C(1)-C(2) 113.54(13), N(2)-C(2)-C(1) 110.04(14), C(36)-N(2)-C(2) 121.40(14), N(2)-C(36)-C(37) 121.35(15), C(36)-C(37)-C(43) 120.09(14), C(37)-C(43)-C(1) 107.48(13).

Selected data for **3S**: M.p. 216-218 °C; <sup>1</sup>H NMR (C<sub>6</sub>D<sub>6</sub>, 400 MHz, 296 K): δ = 1.87 (s, 3H, ArCH<sub>3</sub>), 1.98 (s, 3H, ArCH<sub>3</sub>), 2.49 (d, <sup>2</sup>J<sub>HH</sub> = 12Hz, 1H, C(2)H), 2.85 (d, <sup>2</sup>J<sub>HH</sub> = 12Hz, 1H, C(2)H), 3.58 (br. s, 1H, N(2)H), 3.96 (br. d, 1H, N(1)H), 4.25 (br. d of t, 1H, C(1)H), 5.50 (s, 1H, CHPh<sub>2</sub>), 6.61 (s, 2H, CHPh<sub>2</sub>), 7.18-6.80 (m, 44H, ArH); IR (Nujol) ν/cm<sup>-1</sup>: 3127 (bw, NH), 1596(w), 1261(w), 1154(m), 1077 (s), 1028 (m), 850(m), 722(m); MS EI: *m/z* (%): 903.2 (MH<sup>+</sup>, 100), 440.2 (Ar\*NH<sub>3</sub><sup>+</sup>, 30); acc. mass. calc for C<sub>68</sub>H<sub>58</sub>N<sub>2</sub>: 902.4600, found: 902.4673.

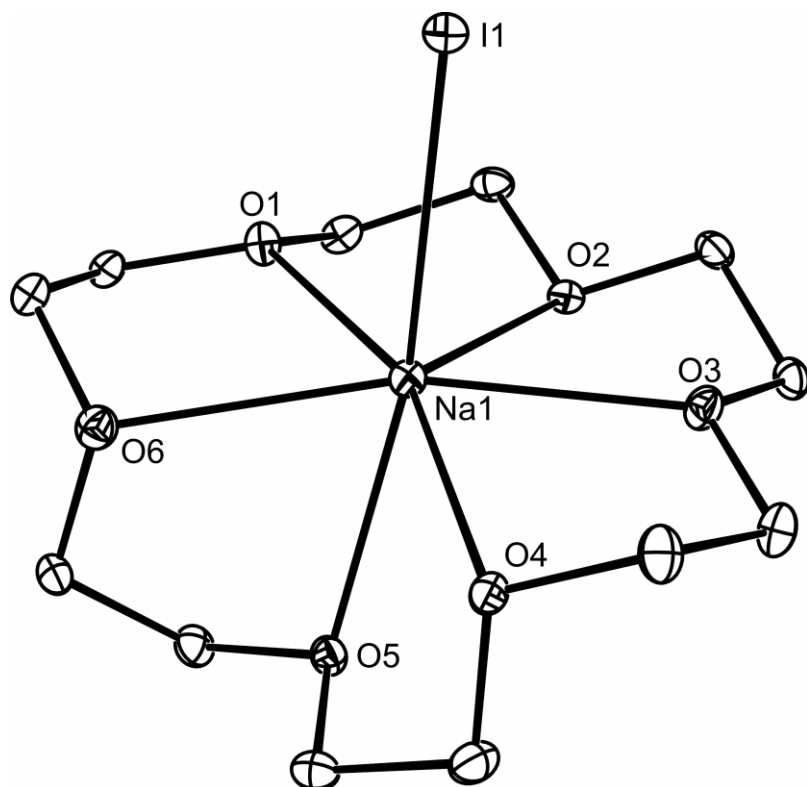

**Figure S5.** Molecular structure of **4S** (25% displacement ellipsoids are shown; hydrogens omitted).

Selected bond lengths (Å): I(1)-Na(1) 3.1381(14), Na(1)-O(3) 2.476(3), Na(1)-O(5) 2.496(3), Na(1)-O(1) 2.536(3), Na(1)-O(4) 2.575(3), Na(1)-O(2) 2.585(3), Na(1)-O(6) 2.631(3).



**Table S2.** Cartesian coordinates for the calculated structure of **11** (total energy: -13385.76182

Hartree)

|    |          |          |          |
|----|----------|----------|----------|
| I  | -0.76700 | 3.73900  | 3.61400  |
| Ga | -0.14300 | 3.76100  | 1.00700  |
| Ga | -0.12600 | 1.38900  | 0.10900  |
| N  | -1.44600 | 5.10400  | 0.26400  |
| N  | 1.45000  | 5.01900  | 0.93500  |
| I  | -0.05500 | 1.61800  | -2.72200 |
| I  | 2.47200  | 0.20300  | 0.60200  |
| Ga | 0.00500  | -1.13200 | 0.11400  |
| Ga | -0.04000 | -1.27600 | -2.45900 |
| Ga | -0.20300 | -3.12700 | 1.65100  |
| N  | 1.30900  | -1.69900 | -3.93700 |
| N  | -1.65700 | -1.64800 | -3.61000 |
| I  | -0.87700 | -5.21200 | 0.09900  |
| N  | 1.25100  | -3.85200 | 2.81600  |
| N  | -1.61700 | -3.15700 | 3.12300  |
| C  | -1.33200 | 6.35200  | 0.78900  |
| C  | 1.21900  | 6.31400  | 1.22500  |
| C  | 0.88800  | -4.88900 | 3.62800  |
| C  | 0.96700  | -1.45800 | -5.21700 |
| C  | -1.59500 | -1.24400 | -4.90400 |
| C  | -1.52600 | -4.09300 | 4.07900  |
| C  | -0.11400 | 6.81000  | 1.34100  |
| C  | -0.43400 | -5.02000 | 4.09000  |
| C  | -0.35600 | -1.04900 | -5.55700 |
| C  | -2.33000 | 4.73700  | -0.80100 |
| C  | -3.32700 | 3.73900  | -0.58700 |
| C  | -2.18300 | 5.31300  | -2.09400 |
| C  | -4.16900 | 3.37400  | -1.65000 |
| C  | -3.53100 | 3.10900  | 0.76900  |
| C  | -3.05200 | 4.90300  | -3.12700 |
| C  | -1.15100 | 6.37200  | -2.41700 |
| H  | -4.95600 | 2.62300  | -1.46100 |
| C  | -4.05800 | 3.94400  | -2.93400 |
| H  | -4.52600 | 2.62100  | 0.82900  |
| H  | -3.44400 | 3.84500  | 1.59700  |
| H  | -2.77500 | 2.31800  | 0.98600  |
| H  | -2.93000 | 5.36100  | -4.12500 |
| H  | -0.61800 | 6.12300  | -3.36100 |
| H  | -0.39600 | 6.49200  | -1.61700 |
| H  | -1.63000 | 7.36600  | -2.57500 |
| C  | -4.99200 | 3.53200  | -4.05000 |
| H  | -4.90300 | 2.44500  | -4.27600 |
| H  | -4.77900 | 4.08900  | -4.98800 |
| H  | -6.05600 | 3.71900  | -3.78000 |
| C  | 2.71100  | 4.43600  | 0.55400  |
| C  | 3.10200  | 4.46800  | -0.81100 |
| C  | 3.51800  | 3.77000  | 1.51500  |
| C  | 4.32500  | 3.87700  | -1.18200 |
| C  | 2.23700  | 5.13100  | -1.85500 |
| C  | 4.73500  | 3.20400  | 1.09200  |
| C  | 3.11000  | 3.66300  | 2.96400  |
| H  | 4.62900  | 3.91800  | -2.24300 |
| C  | 5.16500  | 3.24500  | -0.24700 |
| H  | 2.69700  | 5.04700  | -2.86200 |
| H  | 2.07400  | 6.21200  | -1.64300 |
| H  | 1.23000  | 4.65900  | -1.90400 |
| H  | 5.37100  | 2.71000  | 1.84700  |
| H  | 2.62800  | 4.58800  | 3.34400  |

|   |          |          |          |
|---|----------|----------|----------|
| H | 3.98600  | 3.43000  | 3.60600  |
| H | 2.36600  | 2.84800  | 3.11100  |
| C | 6.46200  | 2.59200  | -0.67100 |
| H | 6.32200  | 1.49900  | -0.84000 |
| H | 7.25000  | 2.70300  | 0.10600  |
| H | 6.84900  | 3.02600  | -1.61800 |
| C | -2.53800 | 7.35000  | 0.94700  |
| C | -2.77600 | 7.49400  | 2.48000  |
| C | -2.20800 | 8.74100  | 0.34800  |
| C | -3.88200 | 6.89200  | 0.33900  |
| H | -3.65000 | 8.16000  | 2.65900  |
| H | -1.90300 | 7.93000  | 3.01000  |
| H | -2.98700 | 6.50600  | 2.94500  |
| H | -2.00400 | 8.67500  | -0.74300 |
| H | -1.32900 | 9.22000  | 0.82800  |
| H | -3.07500 | 9.42400  | 0.49000  |
| H | -4.20400 | 5.90500  | 0.72800  |
| H | -3.86500 | 6.83700  | -0.76700 |
| H | -4.66200 | 7.63200  | 0.62700  |
| C | 2.32000  | 7.40400  | 1.51200  |
| C | 2.16200  | 7.84500  | 2.99700  |
| C | 2.09000  | 8.62500  | 0.58000  |
| C | 3.79900  | 6.98900  | 1.33200  |
| H | 2.29500  | 6.98300  | 3.68600  |
| H | 1.17300  | 8.29900  | 3.21300  |
| H | 2.94100  | 8.60200  | 3.24100  |
| H | 1.08900  | 9.08700  | 0.70800  |
| H | 2.19400  | 8.33600  | -0.48900 |
| H | 2.85400  | 9.40600  | 0.79400  |
| H | 4.43000  | 7.87600  | 1.56400  |
| H | 4.03800  | 6.67100  | 0.29700  |
| H | 4.10600  | 6.17700  | 2.01800  |
| H | -0.18200 | 7.79900  | 1.80400  |
| C | 2.56000  | -2.26500 | -3.49900 |
| C | 2.67600  | -3.67700 | -3.38000 |
| C | 3.65000  | -1.42300 | -3.15900 |
| C | 3.91400  | -4.22400 | -2.99600 |
| C | 1.50600  | -4.58400 | -3.67600 |
| C | 4.86300  | -2.02400 | -2.76300 |
| C | 3.56100  | 0.08100  | -3.25300 |
| H | 4.00700  | -5.32300 | -2.93500 |
| C | 5.02800  | -3.41800 | -2.69000 |
| H | 1.80500  | -5.65100 | -3.61000 |
| H | 1.07900  | -4.40600 | -4.68700 |
| H | 0.68000  | -4.42700 | -2.94400 |
| H | 5.71800  | -1.36700 | -2.52700 |
| H | 2.93400  | 0.42000  | -4.10400 |
| H | 4.57100  | 0.53100  | -3.35600 |
| H | 3.10200  | 0.51100  | -2.33300 |
| C | 6.34300  | -4.03600 | -2.27000 |
| H | 6.31300  | -4.37500 | -1.20800 |
| H | 7.18300  | -3.31400 | -2.36200 |
| H | 6.59000  | -4.93000 | -2.88500 |
| C | -2.74900 | -2.41200 | -3.07300 |
| C | -3.59200 | -1.85600 | -2.06900 |
| C | -2.97300 | -3.74200 | -3.52700 |
| C | -4.67500 | -2.61700 | -1.59400 |
| C | -3.38200 | -0.45900 | -1.54300 |
| C | -4.07500 | -4.45800 | -3.01700 |
| C | -2.06700 | -4.45100 | -4.51100 |
| H | -5.34200 | -2.16100 | -0.84200 |
| C | -4.94800 | -3.91700 | -2.05900 |
| H | -4.27300 | -0.10800 | -0.98200 |

|   |          |          |          |
|---|----------|----------|----------|
| H | -3.15300 | 0.27500  | -2.34500 |
| H | -2.52100 | -0.40900 | -0.83300 |
| H | -4.24900 | -5.48300 | -3.38800 |
| H | -1.47100 | -5.23100 | -3.98500 |
| H | -1.35300 | -3.77300 | -5.01700 |
| H | -2.66000 | -4.97400 | -5.29400 |
| C | -6.11300 | -4.71900 | -1.52200 |
| H | -6.56000 | -5.36800 | -2.30700 |
| H | -6.91400 | -4.06100 | -1.12200 |
| H | -5.79000 | -5.38900 | -0.69100 |
| C | 1.91400  | -1.57700 | -6.47600 |
| C | 2.00900  | -0.17500 | -7.14600 |
| C | 1.28300  | -2.58900 | -7.47400 |
| C | 3.37100  | -2.04600 | -6.25200 |
| H | 2.68700  | -0.23500 | -8.02700 |
| H | 2.42900  | 0.57700  | -6.44400 |
| H | 1.03100  | 0.20700  | -7.50600 |
| H | 0.26800  | -2.29200 | -7.80900 |
| H | 1.20700  | -3.60100 | -7.01900 |
| H | 1.92800  | -2.67300 | -8.37800 |
| H | 3.44100  | -3.05400 | -5.79600 |
| H | 3.96100  | -1.34600 | -5.63000 |
| H | 3.86400  | -2.09700 | -7.24900 |
| C | -2.85200 | -0.90900 | -5.79500 |
| C | -2.68700 | 0.56400  | -6.27700 |
| C | -2.91700 | -1.84700 | -7.02800 |
| C | -4.22800 | -0.97200 | -5.09400 |
| H | -2.58700 | 1.25700  | -5.41300 |
| H | -3.58700 | 0.86300  | -6.86000 |
| H | -1.80500 | 0.71400  | -6.93300 |
| H | -1.99900 | -1.79500 | -7.65200 |
| H | -3.77700 | -1.55900 | -7.67300 |
| H | -3.06300 | -2.90500 | -6.72200 |
| H | -4.52900 | -1.99900 | -4.81000 |
| H | -4.99300 | -0.58500 | -5.80400 |
| H | -4.26500 | -0.33300 | -4.18900 |
| C | 2.55400  | -3.24600 | 2.82500  |
| C | 2.97700  | -2.48600 | 3.95300  |
| C | 3.39700  | -3.32800 | 1.68000  |
| C | 4.25900  | -1.90100 | 3.94200  |
| C | 2.09500  | -2.23500 | 5.15900  |
| C | 4.66800  | -2.72600 | 1.72300  |
| C | 2.95500  | -4.01900 | 0.41400  |
| H | 4.58000  | -1.32700 | 4.82900  |
| C | 5.13000  | -2.01400 | 2.84600  |
| H | 2.64400  | -2.43400 | 6.10600  |
| H | 1.17600  | -2.85200 | 5.16000  |
| H | 1.78200  | -1.16700 | 5.18800  |
| H | 5.31700  | -2.81400 | 0.83500  |
| H | 2.46000  | -3.29500 | -0.27500 |
| H | 2.23000  | -4.83600 | 0.59800  |
| H | 3.82300  | -4.43000 | -0.14100 |
| C | 6.49100  | -1.35500 | 2.84700  |
| H | 7.25000  | -1.97900 | 2.32500  |
| H | 6.85500  | -1.16500 | 3.88000  |
| H | 6.46200  | -0.37200 | 2.32200  |
| C | -2.63800 | -2.14800 | 3.01400  |
| C | -2.37500 | -0.84200 | 3.50400  |
| C | -3.87100 | -2.44600 | 2.37300  |
| C | -3.39200 | 0.13100  | 3.41900  |
| C | -1.05800 | -0.50900 | 4.16100  |
| C | -4.85400 | -1.44000 | 2.32200  |
| C | -4.15900 | -3.80700 | 1.78800  |

|   |          |          |          |
|---|----------|----------|----------|
| H | -3.18800 | 1.13800  | 3.82000  |
| C | -4.65000 | -0.15300 | 2.85800  |
| H | -0.91400 | -1.08000 | 5.10700  |
| H | -0.99200 | 0.57400  | 4.39400  |
| H | -0.19500 | -0.76500 | 3.50600  |
| H | -5.83000 | -1.68500 | 1.86600  |
| H | -3.81400 | -4.63500 | 2.44300  |
| H | -3.63400 | -3.95000 | 0.81600  |
| H | -5.24700 | -3.93600 | 1.60800  |
| C | -5.76700 | 0.86800  | 2.86300  |
| H | -6.26900 | 0.93700  | 1.87200  |
| H | -5.39700 | 1.87900  | 3.13300  |
| H | -6.55600 | 0.59500  | 3.60200  |
| C | 1.91000  | -5.99700 | 4.08300  |
| C | 2.81700  | -6.42000 | 2.90200  |
| C | 2.79100  | -5.52200 | 5.26800  |
| C | 1.18100  | -7.28600 | 4.55100  |
| H | 3.48400  | -5.60200 | 2.56800  |
| H | 2.21100  | -6.76200 | 2.03500  |
| H | 3.46500  | -7.26700 | 3.22200  |
| H | 3.41200  | -6.37400 | 5.62900  |
| H | 2.16600  | -5.17500 | 6.12000  |
| H | 3.47700  | -4.70200 | 4.97800  |
| H | 1.94100  | -8.08100 | 4.71700  |
| H | 0.46300  | -7.65800 | 3.78900  |
| H | 0.64400  | -7.15600 | 5.51500  |
| H | -0.45400 | -0.68600 | -6.58400 |
| C | -2.51100 | -4.29400 | 5.29400  |
| C | -3.68300 | -3.29600 | 5.44400  |
| C | -3.13900 | -5.71400 | 5.20900  |
| C | -1.67800 | -4.18000 | 6.60400  |
| H | -4.22200 | -3.54600 | 6.38600  |
| H | -4.41700 | -3.35800 | 4.61800  |
| H | -3.34700 | -2.24300 | 5.52400  |
| H | -2.38600 | -6.52900 | 5.25300  |
| H | -3.72300 | -5.84300 | 4.27200  |
| H | -3.83500 | -5.85900 | 6.06400  |
| H | -2.34600 | -4.32300 | 7.48300  |
| H | -1.21400 | -3.17300 | 6.69200  |
| H | -0.86700 | -4.93400 | 6.66400  |
| H | -0.60900 | -5.89000 | 4.72400  |
